# Supplementary material
Source: publisher site journal article supplement (https://www.dovepress.com/article/438407)
Supplement: Supplementary file 1 [file get_supplementary_file.php]

Supplementary Table 1: A gene set consisting of 177 members that are significantly associated with OA was compiled from a total of 187 studies.

| Supplementary Table 1 |
| --- |
| Gene |
| TGFA |
| LRCH1 |
| PPARA |
| TLR2 |
| TAC1 |
| IL6 |
| ANKRD6 |
| BMP5 |
| PTGS2 |
| KHDRBS1 |
| PON1 |
| TACR1 |
| XCL2 |
| MMP2 |
| MMP1 |
| ADAM12 |
| NME8 |
| THRSP |
| TNF |
| LINC01006 |
| IL1A |
| BTNL2 |
| MIR155 |
| PEPD |
| KL |
| ASPN |
| EPAS1 |
| ACE |
| PCSK6 |
| TRPV1 |
| IL1B |
| COL6A4P1 |
| TNFRSF1B |
| TGFB1 |
| COX2 |
| SOCS3 |
| PLAU |
| SMAD3 |
| TLR9 |
| IL1RN |
| GDF5 |
| ACAN |
| RHOB |
| TNFSF11 |
| COL6A4P2 |
| MMP3 |
| MMP9 |
| GLIS3 |
| NFKB1 |
| AGER |
| BAG6 |
| TNFRSF11B |
| D1S111 |
| BCL9 |
| MAPK8 |
| TNFRSF1A |
| POU5F1 |
| TLR3 |
| BUD31 |
| TENT5A |
| HFE |
| PITX1 |
| ZNF410 |
| SLC22A3 |
| LPAR1 |
| ALDH1A2 |
| CD40 |
| COL2A1 |
| VDR |
| CALCA |
| CCR2 |
| BDKRB2 |
| CDX2 |
| IL16 |
| MAGI1 |
| AR |
| COMP |
| MOK |
| PCYT1A |
| PDE3B |
| TNFAIP6 |
| IL18 |
| SFRP1 |
| TCP1 |
| ESR1 |
| PRG4 |
| TGFBR1 |
| MIR21 |
| MIR223 |
| SERPINE1 |
| SOST |
| IGFBP3 |
| DCSTAMP |
| COL11A1 |
| COL9A2 |
| IL4R |
| ADAMTS4 |
| ERVK-24 |
| IGFBP7 |
| CHIT1 |
| DIO2 |
| CALM1 |
| FRZB |
| FTO |
| WNT5B |
| SP1 |
| COL11A2 |
| ERVK-25 |
| MMP13 |
| CXCL8 |
| CCL3 |
| VEGFA |
| CALM3 |
| COL1A1 |
| LEP |
| CHADL |
| ERVK-6 |
| SOX9 |
| ADAMTS3 |
| MIRLET7E |
| ERVK-7 |
| NCOA3 |
| BMP4 |
| ERVK-18 |
| CALM2 |
| DOT1L |
| ERVK-21 |
| COL9A1 |
| ANP32A |
| ERVK-19 |
| ERVK-8 |
| COL10A1 |
| ERVK-9 |
| TWIST1 |
| ERVK-10 |
| SMAD1 |
| PTHLH |
| BGLAP |
| CMC1 |
| CRP |
| ROR2 |
| ENPP1 |
| PDGFRB |
| RBFOX1 |
| MATN3 |
| DUS4L |
| TIMP1 |
| IL13 |
| MGP |
| ESR2 |
| TIMP2 |
| CCND1 |
| IL4 |
| BCAP29 |
| DIP |
| TRIB1 |
| PARD3B |
| CILP |
| HCK |
| PHB |
| FGFR4 |
| GHR |
| CCL8 |
| IGF1 |
| EPHA8 |
| BMPR1A |
| LRRC32 |
| GH1 |
| PART1 |
| SFRP4 |
| TPSG1 |
| CNGB1 |
| PTK2B |
| PTH2R |
| BMP2 |
| NAMPT |
| CASR |

Supplementary Table 2: Biological Functions and Pathway Enrichment Analysis that are enriched in the Gene Set.

| Supplementary Table 2 | | | | |
| --- | --- | --- | --- | --- |
| ID | Description | setSize | pvalue | padjust |
| GO:0010628 | positive regulation of gene expression | 39 | 1.59E-27 | 3.54E-24 |
| GO:0001501 | skeletal system development | 24 | 2.20E-23 | 2.44E-20 |
| GO:0019221 | cytokine-mediated signaling pathway | 28 | 4.09E-21 | 3.03E-18 |
| GO:0006954 | inflammatory response | 30 | 5.62E-20 | 3.11E-17 |
| GO:0051216 | cartilage development | 15 | 2.44E-16 | 1.08E-13 |
| GO:0030198 | extracellular matrix organization | 20 | 2.52E-14 | 9.30E-12 |
| GO:0008285 | negative regulation of cell population proliferation | 25 | 1.70E-13 | 5.38E-11 |
| GO:0001503 | ossification | 14 | 4.44E-13 | 1.23E-10 |
| GO:0042531 | positive regulation of tyrosine phosphorylation of STAT protein | 12 | 1.60E-12 | 3.93E-10 |
| GO:0010718 | positive regulation of epithelial to mesenchymal transition | 10 | 7.34E-12 | 1.63E-09 |
| GO:0050679 | positive regulation of epithelial cell proliferation | 11 | 9.82E-12 | 1.98E-09 |
| GO:0006955 | immune response | 24 | 1.15E-11 | 2.13E-09 |
| GO:0050729 | positive regulation of inflammatory response | 12 | 1.43E-11 | 2.43E-09 |
| GO:0030335 | positive regulation of cell migration | 17 | 5.63E-11 | 8.91E-09 |
| GO:0048661 | positive regulation of smooth muscle cell proliferation | 10 | 1.02E-10 | 1.51E-08 |
| GO:0071260 | cellular response to mechanical stimulus | 11 | 1.22E-10 | 1.70E-08 |
| GO:0043065 | positive regulation of apoptotic process | 20 | 1.43E-10 | 1.86E-08 |
| GO:0001649 | osteoblast differentiation | 12 | 1.97E-10 | 2.43E-08 |
| GO:0071363 | cellular response to growth factor stimulus | 10 | 5.14E-10 | 6.00E-08 |
| GO:0045766 | positive regulation of angiogenesis | 13 | 1.03E-09 | 1.14E-07 |
| GO:0010629 | negative regulation of gene expression | 16 | 2.56E-09 | 2.70E-07 |
| GO:0032757 | positive regulation of interleukin-8 production | 7 | 3.95E-09 | 3.98E-07 |
| GO:0030282 | bone mineralization | 8 | 4.50E-09 | 4.33E-07 |
| GO:0046330 | positive regulation of JNK cascade | 10 | 4.70E-09 | 4.34E-07 |
| GO:0001774 | microglial cell activation | 7 | 5.17E-09 | 4.43E-07 |
| GO:0060749 | mammary gland alveolus development | 6 | 5.20E-09 | 4.43E-07 |
| GO:0043410 | positive regulation of MAPK cascade | 11 | 6.37E-09 | 5.23E-07 |
| GO:0030199 | collagen fibril organization | 8 | 7.80E-09 | 6.17E-07 |
| GO:0051092 | positive regulation of NF-kappaB transcription factor activity | 12 | 9.87E-09 | 7.55E-07 |
| GO:0150077 | regulation of neuroinflammatory response | 5 | 1.28E-08 | 9.47E-07 |
| GO:0120162 | positive regulation of cold-induced thermogenesis | 10 | 1.54E-08 | 1.07E-06 |
| GO:0001502 | cartilage condensation | 6 | 1.59E-08 | 1.07E-06 |
| GO:0032331 | negative regulation of chondrocyte differentiation | 6 | 1.59E-08 | 1.07E-06 |
| GO:0030500 | regulation of bone mineralization | 6 | 3.02E-08 | 1.97E-06 |
| GO:0001775 | cell activation | 5 | 3.97E-08 | 2.52E-06 |
| GO:0070374 | positive regulation of ERK1 and ERK2 cascade | 13 | 5.11E-08 | 3.11E-06 |
| GO:0001666 | response to hypoxia | 12 | 5.20E-08 | 3.11E-06 |
| GO:0071222 | cellular response to lipopolysaccharide | 12 | 5.54E-08 | 3.23E-06 |
| GO:0051897 | positive regulation of protein kinase B signaling | 12 | 6.28E-08 | 3.57E-06 |
| GO:0032755 | positive regulation of interleukin-6 production | 8 | 6.57E-08 | 3.59E-06 |
| GO:0002062 | chondrocyte differentiation | 7 | 6.81E-08 | 3.59E-06 |
| GO:0007566 | embryo implantation | 7 | 6.81E-08 | 3.59E-06 |
| GO:0030509 | BMP signaling pathway | 9 | 7.22E-08 | 3.72E-06 |
| GO:0001525 | angiogenesis | 14 | 7.61E-08 | 3.84E-06 |
| GO:0022617 | extracellular matrix disassembly | 8 | 8.51E-08 | 4.19E-06 |
| GO:0002548 | monocyte chemotaxis | 7 | 9.62E-08 | 4.54E-06 |
| GO:0030574 | collagen catabolic process | 7 | 9.62E-08 | 4.54E-06 |
| GO:0014068 | positive regulation of phosphatidylinositol 3-kinase signaling | 9 | 1.08E-07 | 4.97E-06 |
| GO:0007267 | cell-cell signaling | 13 | 1.21E-07 | 5.46E-06 |
| GO:1904645 | response to amyloid-beta | 5 | 1.47E-07 | 6.53E-06 |
| GO:0042060 | wound healing | 9 | 1.72E-07 | 7.49E-06 |
| GO:0010862 | positive regulation of pathway-restricted SMAD protein phosphorylation | 7 | 1.82E-07 | 7.77E-06 |
| GO:0010468 | regulation of gene expression | 13 | 2.92E-07 | 1.22E-05 |
| GO:0071356 | cellular response to tumor necrosis factor | 10 | 3.86E-07 | 1.58E-05 |
| GO:0032355 | response to estradiol | 9 | 4.09E-07 | 1.64E-05 |
| GO:0031663 | lipopolysaccharide-mediated signaling pathway | 6 | 4.13E-07 | 1.64E-05 |
| GO:0001934 | positive regulation of protein phosphorylation | 11 | 6.79E-07 | 2.61E-05 |
| GO:0001660 | fever generation | 3 | 6.94E-07 | 2.61E-05 |
| GO:0075206 | positive regulation by host of symbiont cAMP-mediated signal transduction | 3 | 6.94E-07 | 2.61E-05 |
| GO:0071773 | cellular response to BMP stimulus | 6 | 7.11E-07 | 2.63E-05 |
| GO:0032722 | positive regulation of chemokine production | 5 | 7.34E-07 | 2.64E-05 |
| GO:0010888 | negative regulation of lipid storage | 4 | 7.39E-07 | 2.64E-05 |
| GO:0060395 | SMAD protein signal transduction | 7 | 8.02E-07 | 2.82E-05 |
| GO:0043491 | protein kinase B signaling | 6 | 8.42E-07 | 2.92E-05 |
| GO:0030279 | negative regulation of ossification | 5 | 9.56E-07 | 3.26E-05 |
| GO:0071560 | cellular response to transforming growth factor beta stimulus | 7 | 1.27E-06 | 4.21E-05 |
| GO:1901224 | positive regulation of NIK/NF-kappaB signaling | 7 | 1.27E-06 | 4.21E-05 |
| GO:0045429 | positive regulation of nitric oxide biosynthetic process | 6 | 1.36E-06 | 4.44E-05 |
| GO:0014070 | response to organic cyclic compound | 9 | 1.79E-06 | 5.74E-05 |
| GO:0035137 | hindlimb morphogenesis | 4 | 1.91E-06 | 5.94E-05 |
| GO:0045080 | positive regulation of chemokine biosynthetic process | 4 | 1.91E-06 | 5.94E-05 |
| GO:0042104 | positive regulation of activated T cell proliferation | 5 | 1.95E-06 | 5.94E-05 |
| GO:0045671 | negative regulation of osteoclast differentiation | 5 | 1.95E-06 | 5.94E-05 |
| GO:0050728 | negative regulation of inflammatory response | 9 | 2.04E-06 | 6.11E-05 |
| GO:0048705 | skeletal system morphogenesis | 6 | 2.11E-06 | 6.25E-05 |
| GO:0051384 | response to glucocorticoid | 7 | 2.17E-06 | 6.33E-05 |
| GO:0030730 | sequestering of triglyceride | 3 | 2.76E-06 | 7.84E-05 |
| GO:0034123 | positive regulation of toll-like receptor signaling pathway | 3 | 2.76E-06 | 7.84E-05 |
| GO:0150078 | positive regulation of neuroinflammatory response | 4 | 2.84E-06 | 7.98E-05 |
| GO:0032735 | positive regulation of interleukin-12 production | 5 | 2.98E-06 | 8.26E-05 |
| GO:0007179 | transforming growth factor beta receptor signaling pathway | 8 | 3.10E-06 | 8.47E-05 |
| GO:1904707 | positive regulation of vascular smooth muscle cell proliferation | 6 | 3.62E-06 | 9.77E-05 |
| GO:0005513 | detection of calcium ion | 4 | 4.08E-06 | 0.000105733 |
| GO:0014912 | negative regulation of smooth muscle cell migration | 4 | 4.08E-06 | 0.000105733 |
| GO:0043568 | positive regulation of insulin-like growth factor receptor signaling pathway | 4 | 4.08E-06 | 0.000105733 |
| GO:0045597 | positive regulation of cell differentiation | 6 | 4.10E-06 | 0.000105733 |
| GO:0045840 | positive regulation of mitotic nuclear division | 5 | 4.39E-06 | 0.000111922 |
| GO:0043123 | positive regulation of I-kappaB kinase/NF-kappaB signaling | 10 | 5.21E-06 | 0.000131135 |
| GO:0050930 | induction of positive chemotaxis | 4 | 5.67E-06 | 0.000141191 |
| GO:0044267 | cellular protein metabolic process | 11 | 5.90E-06 | 0.000145309 |
| GO:0046427 | positive regulation of receptor signaling pathway via JAK-STAT | 5 | 6.28E-06 | 0.000152937 |
| GO:0032760 | positive regulation of tumor necrosis factor production | 6 | 6.61E-06 | 0.000159226 |
| GO:0031622 | positive regulation of fever generation | 3 | 6.85E-06 | 0.000159911 |
| GO:0051343 | positive regulation of cyclic-nucleotide phosphodiesterase activity | 3 | 6.85E-06 | 0.000159911 |
| GO:0097065 | anterior head development | 3 | 6.85E-06 | 0.000159911 |
| GO:1900745 | positive regulation of p38MAPK cascade | 5 | 7.43E-06 | 0.000171612 |
| GO:0032516 | positive regulation of phosphoprotein phosphatase activity | 4 | 7.68E-06 | 0.000175429 |
| GO:0071347 | cellular response to interleukin-1 | 7 | 8.48E-06 | 0.000191911 |
| GO:0030593 | neutrophil chemotaxis | 7 | 9.20E-06 | 0.000205932 |
| GO:0030502 | negative regulation of bone mineralization | 4 | 1.02E-05 | 0.000225316 |
| GO:0007204 | positive regulation of cytosolic calcium ion concentration | 9 | 1.05E-05 | 0.000229675 |
| GO:0019722 | calcium-mediated signaling | 7 | 1.16E-05 | 0.000252959 |
| GO:0042127 | regulation of cell population proliferation | 10 | 1.20E-05 | 0.000258127 |
| GO:0035630 | bone mineralization involved in bone maturation | 3 | 1.36E-05 | 0.000279482 |
| GO:0042976 | activation of Janus kinase activity | 3 | 1.36E-05 | 0.000279482 |
| GO:0060351 | cartilage development involved in endochondral bone morphogenesis | 3 | 1.36E-05 | 0.000279482 |
| GO:0060687 | regulation of branching involved in prostate gland morphogenesis | 3 | 1.36E-05 | 0.000279482 |
| GO:1903140 | regulation of establishment of endothelial barrier | 3 | 1.36E-05 | 0.000279482 |
| GO:0030308 | negative regulation of cell growth | 8 | 1.44E-05 | 0.000293183 |
| GO:0009725 | response to hormone | 6 | 1.53E-05 | 0.000300612 |
| GO:0034097 | response to cytokine | 6 | 1.53E-05 | 0.000300612 |
| GO:0043406 | positive regulation of MAP kinase activity | 6 | 1.53E-05 | 0.000300612 |
| GO:0045669 | positive regulation of osteoblast differentiation | 6 | 1.53E-05 | 0.000300612 |
| GO:0003203 | endocardial cushion morphogenesis | 4 | 1.69E-05 | 0.000327716 |
| GO:0030501 | positive regulation of bone mineralization | 5 | 1.83E-05 | 0.000352013 |
| GO:0050731 | positive regulation of peptidyl-tyrosine phosphorylation | 7 | 1.95E-05 | 0.000372278 |
| GO:0043627 | response to estrogen | 6 | 2.03E-05 | 0.000382195 |
| GO:0051592 | response to calcium ion | 6 | 2.03E-05 | 0.000382195 |
| GO:0043507 | positive regulation of JUN kinase activity | 5 | 2.09E-05 | 0.00038892 |
| GO:0009612 | response to mechanical stimulus | 6 | 2.23E-05 | 0.000411674 |
| GO:0000165 | MAPK cascade | 11 | 2.36E-05 | 0.000426634 |
| GO:0002639 | positive regulation of immunoglobulin production | 3 | 2.37E-05 | 0.000426634 |
| GO:0032635 | interleukin-6 production | 3 | 2.37E-05 | 0.000426634 |
| GO:0002063 | chondrocyte development | 4 | 2.63E-05 | 0.000470454 |
| GO:0050680 | negative regulation of epithelial cell proliferation | 6 | 2.66E-05 | 0.000471967 |
| GO:0007568 | aging | 9 | 3.15E-05 | 0.000554469 |
| GO:0071300 | cellular response to retinoic acid | 6 | 3.43E-05 | 0.000599572 |
| GO:0006029 | proteoglycan metabolic process | 3 | 3.76E-05 | 0.000636732 |
| GO:0060316 | positive regulation of ryanodine-sensitive calcium-release channel activity | 3 | 3.76E-05 | 0.000636732 |
| GO:0060346 | bone trabecula formation | 3 | 3.76E-05 | 0.000636732 |
| GO:1901844 | regulation of cell communication by electrical coupling involved in cardiac conduction | 3 | 3.76E-05 | 0.000636732 |
| GO:0090090 | negative regulation of canonical Wnt signaling pathway | 9 | 3.92E-05 | 0.000648218 |
| GO:0051000 | positive regulation of nitric-oxide synthase activity | 4 | 3.92E-05 | 0.000648218 |
| GO:0051968 | positive regulation of synaptic transmission, glutamatergic | 4 | 3.92E-05 | 0.000648218 |
| GO:0070098 | chemokine-mediated signaling pathway | 6 | 4.04E-05 | 0.000664066 |
| GO:0006874 | cellular calcium ion homeostasis | 7 | 4.28E-05 | 0.0006978 |
| GO:0031954 | positive regulation of protein autophosphorylation | 4 | 4.71E-05 | 0.000756668 |
| GO:0045662 | negative regulation of myoblast differentiation | 4 | 4.71E-05 | 0.000756668 |
| GO:0008584 | male gonad development | 7 | 4.83E-05 | 0.000765232 |
| GO:0030155 | regulation of cell adhesion | 5 | 4.83E-05 | 0.000765232 |
| GO:0043569 | negative regulation of insulin-like growth factor receptor signaling pathway | 3 | 5.61E-05 | 0.000881553 |
| GO:0051091 | positive regulation of DNA-binding transcription factor activity | 7 | 6.47E-05 | 0.001009875 |
| GO:0003130 | BMP signaling pathway involved in heart induction | 2 | 7.89E-05 | 0.001191948 |
| GO:0032943 | mononuclear cell proliferation | 2 | 7.89E-05 | 0.001191948 |
| GO:0090151 | establishment of protein localization to mitochondrial membrane | 2 | 7.89E-05 | 0.001191948 |
| GO:1903597 | negative regulation of gap junction assembly | 2 | 7.89E-05 | 0.001191948 |
| GO:0030728 | ovulation | 3 | 7.96E-05 | 0.001191948 |
| GO:0061037 | negative regulation of cartilage development | 3 | 7.96E-05 | 0.001191948 |
| GO:0048146 | positive regulation of fibroblast proliferation | 5 | 8.09E-05 | 0.001202993 |
| GO:0050727 | regulation of inflammatory response | 6 | 8.52E-05 | 0.001258723 |
| GO:0033209 | tumor necrosis factor-mediated signaling pathway | 7 | 9.00E-05 | 0.00131561 |
| GO:0010575 | positive regulation of vascular endothelial growth factor production | 4 | 9.08E-05 | 0.00131561 |
| GO:0040014 | regulation of multicellular organism growth | 4 | 9.08E-05 | 0.00131561 |
| GO:0007254 | JNK cascade | 5 | 9.78E-05 | 0.001389374 |
| GO:0010942 | positive regulation of cell death | 5 | 9.78E-05 | 0.001389374 |
| GO:0051496 | positive regulation of stress fiber assembly | 5 | 9.78E-05 | 0.001389374 |
| GO:0006935 | chemotaxis | 8 | 0.000103123 | 0.0014562 |
| GO:0001958 | endochondral ossification | 4 | 0.000105193 | 0.001457584 |
| GO:0003180 | aortic valve morphogenesis | 4 | 0.000105193 | 0.001457584 |
| GO:0050768 | negative regulation of neurogenesis | 4 | 0.000105193 | 0.001457584 |
| GO:0032725 | positive regulation of granulocyte macrophage colony-stimulating factor production | 3 | 0.000108694 | 0.001478375 |
| GO:0060315 | negative regulation of ryanodine-sensitive calcium-release channel activity | 3 | 0.000108694 | 0.001478375 |
| GO:0060391 | positive regulation of SMAD protein signal transduction | 3 | 0.000108694 | 0.001478375 |
| GO:0003007 | heart morphogenesis | 5 | 0.000117271 | 0.001575691 |
| GO:0045600 | positive regulation of fat cell differentiation | 5 | 0.000117271 | 0.001575691 |
| GO:0000187 | activation of MAPK activity | 7 | 0.000122953 | 0.001642092 |
| GO:0043401 | steroid hormone mediated signaling pathway | 5 | 0.000128077 | 0.001700284 |
| GO:0071456 | cellular response to hypoxia | 7 | 0.000129285 | 0.001706101 |
| GO:0021983 | pituitary gland development | 4 | 0.000138859 | 0.001793914 |
| GO:0043388 | positive regulation of DNA binding | 4 | 0.000138859 | 0.001793914 |
| GO:1902895 | positive regulation of pri-miRNA transcription by RNA polymerase II | 4 | 0.000138859 | 0.001793914 |
| GO:0010595 | positive regulation of endothelial cell migration | 5 | 0.000139631 | 0.001793914 |
| GO:0002237 | response to molecule of bacterial origin | 3 | 0.000143978 | 0.001793914 |
| GO:0007252 | I-kappaB phosphorylation | 3 | 0.000143978 | 0.001793914 |
| GO:0050927 | positive regulation of positive chemotaxis | 3 | 0.000143978 | 0.001793914 |
| GO:0071639 | positive regulation of monocyte chemotactic protein-1 production | 3 | 0.000143978 | 0.001793914 |
| GO:0150079 | negative regulation of neuroinflammatory response | 3 | 0.000143978 | 0.001793914 |
| GO:0032496 | response to lipopolysaccharide | 8 | 0.000144031 | 0.001793914 |
| GO:0010033 | response to organic substance | 6 | 0.000172661 | 0.002138486 |
| GO:0042981 | regulation of apoptotic process | 10 | 0.000177201 | 0.00218252 |
| GO:0007492 | endoderm development | 4 | 0.000179699 | 0.002201061 |
| GO:0060389 | pathway-restricted SMAD protein phosphorylation | 3 | 0.000185949 | 0.002252722 |
| GO:1902894 | negative regulation of pri-miRNA transcription by RNA polymerase II | 3 | 0.000185949 | 0.002252722 |
| GO:0043408 | regulation of MAPK cascade | 5 | 0.000194008 | 0.002324952 |
| GO:0060348 | bone development | 5 | 0.000194008 | 0.002324952 |
| GO:0010243 | response to organonitrogen compound | 4 | 0.000203073 | 0.00240756 |
| GO:0030316 | osteoclast differentiation | 4 | 0.000203073 | 0.00240756 |
| GO:0030324 | lung development | 6 | 0.00021801 | 0.002496201 |
| GO:0002027 | regulation of heart rate | 4 | 0.000228562 | 0.002496201 |
| GO:0048701 | embryonic cranial skeleton morphogenesis | 4 | 0.000228562 | 0.002496201 |
| GO:2000778 | positive regulation of interleukin-6 secretion | 4 | 0.000228562 | 0.002496201 |
| GO:0045651 | positive regulation of macrophage differentiation | 3 | 0.000235116 | 0.002496201 |
| GO:0045779 | negative regulation of bone resorption | 3 | 0.000235116 | 0.002496201 |
| GO:0071305 | cellular response to vitamin D | 3 | 0.000235116 | 0.002496201 |
| GO:0001936 | regulation of endothelial cell proliferation | 2 | 0.000235321 | 0.002496201 |
| GO:0002739 | regulation of cytokine secretion involved in immune response | 2 | 0.000235321 | 0.002496201 |
| GO:0010574 | regulation of vascular endothelial growth factor production | 2 | 0.000235321 | 0.002496201 |
| GO:0038091 | positive regulation of cell proliferation by VEGF-activated platelet derived growth factor receptor signaling pathway | 2 | 0.000235321 | 0.002496201 |
| GO:0045917 | positive regulation of complement activation | 2 | 0.000235321 | 0.002496201 |
| GO:0048625 | myoblast fate commitment | 2 | 0.000235321 | 0.002496201 |
| GO:0060559 | positive regulation of calcidiol 1-monooxygenase activity | 2 | 0.000235321 | 0.002496201 |
| GO:0060745 | mammary gland branching involved in pregnancy | 2 | 0.000235321 | 0.002496201 |
| GO:0061044 | negative regulation of vascular wound healing | 2 | 0.000235321 | 0.002496201 |
| GO:0072138 | mesenchymal cell proliferation involved in ureteric bud development | 2 | 0.000235321 | 0.002496201 |
| GO:0072193 | ureter smooth muscle cell differentiation | 2 | 0.000235321 | 0.002496201 |
| GO:1902339 | positive regulation of apoptotic process involved in morphogenesis | 2 | 0.000235321 | 0.002496201 |
| GO:1903660 | negative regulation of complement-dependent cytotoxicity | 2 | 0.000235321 | 0.002496201 |
| GO:1905517 | macrophage migration | 2 | 0.000235321 | 0.002496201 |
| GO:2000439 | positive regulation of monocyte extravasation | 2 | 0.000235321 | 0.002496201 |
| GO:0031667 | response to nutrient levels | 5 | 0.000244385 | 0.002567775 |
| GO:0042102 | positive regulation of T cell proliferation | 5 | 0.000244385 | 0.002567775 |
| GO:0045765 | regulation of angiogenesis | 4 | 0.000256274 | 0.002679994 |
| GO:0008217 | regulation of blood pressure | 5 | 0.000263207 | 0.00271409 |
| GO:0035019 | somatic stem cell population maintenance | 5 | 0.000263207 | 0.00271409 |
| GO:0045165 | cell fate commitment | 5 | 0.000263207 | 0.00271409 |
| GO:0009887 | animal organ morphogenesis | 7 | 0.000284145 | 0.002902741 |
| GO:2001240 | negative regulation of extrinsic apoptotic signaling pathway in absence of ligand | 4 | 0.00028632 | 0.002902741 |
| GO:0007166 | cell surface receptor signaling pathway | 9 | 0.000288513 | 0.002902741 |
| GO:0045410 | positive regulation of interleukin-6 biosynthetic process | 3 | 0.000291976 | 0.002902741 |
| GO:0045670 | regulation of osteoclast differentiation | 3 | 0.000291976 | 0.002902741 |
| GO:0045778 | positive regulation of ossification | 3 | 0.000291976 | 0.002902741 |
| GO:0051770 | positive regulation of nitric-oxide synthase biosynthetic process | 3 | 0.000291976 | 0.002902741 |
| GO:2000573 | positive regulation of DNA biosynthetic process | 3 | 0.000291976 | 0.002902741 |
| GO:2001237 | negative regulation of extrinsic apoptotic signaling pathway | 4 | 0.000318812 | 0.003155382 |
| GO:0007249 | I-kappaB kinase/NF-kappaB signaling | 5 | 0.000326321 | 0.003201126 |
| GO:0071407 | cellular response to organic cyclic compound | 5 | 0.000326321 | 0.003201126 |
| GO:0060021 | roof of mouth development | 5 | 0.000349713 | 0.003396958 |
| GO:0030522 | intracellular receptor signaling pathway | 4 | 0.000353863 | 0.003396958 |
| GO:0034614 | cellular response to reactive oxygen species | 4 | 0.000353863 | 0.003396958 |
| GO:0034116 | positive regulation of heterotypic cell-cell adhesion | 3 | 0.00035701 | 0.003396958 |
| GO:0046325 | negative regulation of glucose import | 3 | 0.00035701 | 0.003396958 |
| GO:0051044 | positive regulation of membrane protein ectodomain proteolysis | 3 | 0.00035701 | 0.003396958 |
| GO:0061036 | positive regulation of cartilage development | 3 | 0.00035701 | 0.003396958 |
| GO:0001837 | epithelial to mesenchymal transition | 4 | 0.000391587 | 0.003694253 |
| GO:0031334 | positive regulation of protein complex assembly | 4 | 0.000391587 | 0.003694253 |
| GO:0042493 | response to drug | 10 | 0.000416346 | 0.003911181 |
| GO:0043032 | positive regulation of macrophage activation | 3 | 0.000430684 | 0.003978443 |
| GO:0048143 | astrocyte activation | 3 | 0.000430684 | 0.003978443 |
| GO:0050995 | negative regulation of lipid catabolic process | 3 | 0.000430684 | 0.003978443 |
| GO:0090280 | positive regulation of calcium ion import | 3 | 0.000430684 | 0.003978443 |
| GO:0008360 | regulation of cell shape | 7 | 0.000446459 | 0.004020525 |
| GO:0002248 | connective tissue replacement involved in inflammatory response wound healing | 2 | 0.000467882 | 0.004020525 |
| GO:0002724 | regulation of T cell cytokine production | 2 | 0.000467882 | 0.004020525 |
| GO:0003177 | pulmonary valve development | 2 | 0.000467882 | 0.004020525 |
| GO:0003332 | negative regulation of extracellular matrix constituent secretion | 2 | 0.000467882 | 0.004020525 |
| GO:0009582 | detection of abiotic stimulus | 2 | 0.000467882 | 0.004020525 |
| GO:0032348 | negative regulation of aldosterone biosynthetic process | 2 | 0.000467882 | 0.004020525 |
| GO:0035989 | tendon development | 2 | 0.000467882 | 0.004020525 |
| GO:0042482 | positive regulation of odontogenesis | 2 | 0.000467882 | 0.004020525 |
| GO:0045356 | positive regulation of interferon-alpha biosynthetic process | 2 | 0.000467882 | 0.004020525 |
| GO:0051098 | regulation of binding | 2 | 0.000467882 | 0.004020525 |
| GO:0061035 | regulation of cartilage development | 2 | 0.000467882 | 0.004020525 |
| GO:0090184 | positive regulation of kidney development | 2 | 0.000467882 | 0.004020525 |
| GO:0098868 | bone growth | 2 | 0.000467882 | 0.004020525 |
| GO:1900086 | positive regulation of peptidyl-tyrosine autophosphorylation | 2 | 0.000467882 | 0.004020525 |
| GO:1901203 | positive regulation of extracellular matrix assembly | 2 | 0.000467882 | 0.004020525 |
| GO:2000065 | negative regulation of cortisol biosynthetic process | 2 | 0.000467882 | 0.004020525 |
| GO:2000491 | positive regulation of hepatic stellate cell activation | 2 | 0.000467882 | 0.004020525 |
| GO:0001657 | ureteric bud development | 4 | 0.000475516 | 0.004054685 |
| GO:0030890 | positive regulation of B cell proliferation | 4 | 0.000475516 | 0.004054685 |
| GO:0033280 | response to vitamin D | 3 | 0.000513451 | 0.004311817 |
| GO:0043011 | myeloid dendritic cell differentiation | 3 | 0.000513451 | 0.004311817 |
| GO:0048566 | embryonic digestive tract development | 3 | 0.000513451 | 0.004311817 |
| GO:0060252 | positive regulation of glial cell proliferation | 3 | 0.000513451 | 0.004311817 |
| GO:0032729 | positive regulation of interferon-gamma production | 4 | 0.000571523 | 0.004781386 |
| GO:0002076 | osteoblast development | 3 | 0.000605748 | 0.004973864 |
| GO:0010614 | negative regulation of cardiac muscle hypertrophy | 3 | 0.000605748 | 0.004973864 |
| GO:0048265 | response to pain | 3 | 0.000605748 | 0.004973864 |
| GO:0051412 | response to corticosterone | 3 | 0.000605748 | 0.004973864 |
| GO:0090190 | positive regulation of branching involved in ureteric bud morphogenesis | 3 | 0.000605748 | 0.004973864 |
| GO:0007169 | transmembrane receptor protein tyrosine kinase signaling pathway | 6 | 0.000631082 | 0.005162763 |
| GO:0045786 | negative regulation of cell cycle | 4 | 0.000680547 | 0.00552664 |
| GO:0097191 | extrinsic apoptotic signaling pathway | 4 | 0.000680547 | 0.00552664 |
| GO:0007178 | transmembrane receptor protein serine/threonine kinase signaling pathway | 3 | 0.000708001 | 0.005646182 |
| GO:0030225 | macrophage differentiation | 3 | 0.000708001 | 0.005646182 |
| GO:0048245 | eosinophil chemotaxis | 3 | 0.000708001 | 0.005646182 |
| GO:0050999 | regulation of nitric-oxide synthase activity | 3 | 0.000708001 | 0.005646182 |
| GO:0070542 | response to fatty acid | 3 | 0.000708001 | 0.005646182 |
| GO:0001822 | kidney development | 6 | 0.000721124 | 0.005728993 |
| GO:0051781 | positive regulation of cell division | 4 | 0.000740235 | 0.005728993 |
| GO:0003176 | aortic valve development | 2 | 0.000775236 | 0.005728993 |
| GO:0007635 | chemosensory behavior | 2 | 0.000775236 | 0.005728993 |
| GO:0010894 | negative regulation of steroid biosynthetic process | 2 | 0.000775236 | 0.005728993 |
| GO:0014910 | regulation of smooth muscle cell migration | 2 | 0.000775236 | 0.005728993 |
| GO:0016202 | regulation of striated muscle tissue development | 2 | 0.000775236 | 0.005728993 |
| GO:0032640 | tumor necrosis factor production | 2 | 0.000775236 | 0.005728993 |
| GO:0032741 | positive regulation of interleukin-18 production | 2 | 0.000775236 | 0.005728993 |
| GO:0042092 | type 2 immune response | 2 | 0.000775236 | 0.005728993 |
| GO:0051023 | regulation of immunoglobulin secretion | 2 | 0.000775236 | 0.005728993 |
| GO:0060043 | regulation of cardiac muscle cell proliferation | 2 | 0.000775236 | 0.005728993 |
| GO:0060512 | prostate gland morphogenesis | 2 | 0.000775236 | 0.005728993 |
| GO:0071504 | cellular response to heparin | 2 | 0.000775236 | 0.005728993 |
| GO:0071677 | positive regulation of mononuclear cell migration | 2 | 0.000775236 | 0.005728993 |
| GO:0090335 | regulation of brown fat cell differentiation | 2 | 0.000775236 | 0.005728993 |
| GO:1902219 | negative regulation of intrinsic apoptotic signaling pathway in response to osmotic stress | 2 | 0.000775236 | 0.005728993 |
| GO:1902617 | response to fluoride | 2 | 0.000775236 | 0.005728993 |
| GO:1903347 | negative regulation of bicellular tight junction assembly | 2 | 0.000775236 | 0.005728993 |
| GO:1905049 | negative regulation of metallopeptidase activity | 2 | 0.000775236 | 0.005728993 |
| GO:2000556 | positive regulation of T-helper 1 cell cytokine production | 2 | 0.000775236 | 0.005728993 |
| GO:2000660 | negative regulation of interleukin-1-mediated signaling pathway | 2 | 0.000775236 | 0.005728993 |
| GO:0010801 | negative regulation of peptidyl-threonine phosphorylation | 3 | 0.000820621 | 0.006004349 |
| GO:0032332 | positive regulation of chondrocyte differentiation | 3 | 0.000820621 | 0.006004349 |
| GO:0055117 | regulation of cardiac muscle contraction | 3 | 0.000820621 | 0.006004349 |
| GO:0016055 | Wnt signaling pathway | 8 | 0.000834596 | 0.006086512 |
| GO:0001701 | in utero embryonic development | 8 | 0.000910673 | 0.006619547 |
| GO:0045599 | negative regulation of fat cell differentiation | 4 | 0.00094142 | 0.006795012 |
| GO:0001894 | tissue homeostasis | 3 | 0.000944007 | 0.006795012 |
| GO:0010880 | regulation of release of sequestered calcium ion into cytosol by sarcoplasmic reticulum | 3 | 0.000944007 | 0.006795012 |
| GO:0045668 | negative regulation of osteoblast differentiation | 4 | 0.001016253 | 0.007291365 |
| GO:0001824 | blastocyst development | 3 | 0.001078543 | 0.007688521 |
| GO:0014032 | neural crest cell development | 3 | 0.001078543 | 0.007688521 |
| GO:0006367 | transcription initiation from RNA polymerase II promoter | 7 | 0.001092233 | 0.007761154 |
| GO:0001957 | intramembranous ossification | 2 | 0.001156046 | 0.007861825 |
| GO:0003272 | endocardial cushion formation | 2 | 0.001156046 | 0.007861825 |
| GO:0007183 | SMAD protein complex assembly | 2 | 0.001156046 | 0.007861825 |
| GO:0031394 | positive regulation of prostaglandin biosynthetic process | 2 | 0.001156046 | 0.007861825 |
| GO:0042487 | regulation of odontogenesis of dentin-containing tooth | 2 | 0.001156046 | 0.007861825 |
| GO:0045843 | negative regulation of striated muscle tissue development | 2 | 0.001156046 | 0.007861825 |
| GO:0046890 | regulation of lipid biosynthetic process | 2 | 0.001156046 | 0.007861825 |
| GO:0055062 | phosphate ion homeostasis | 2 | 0.001156046 | 0.007861825 |
| GO:0060363 | cranial suture morphogenesis | 2 | 0.001156046 | 0.007861825 |
| GO:0060527 | prostate epithelial cord arborization involved in prostate glandular acinus morphogenesis | 2 | 0.001156046 | 0.007861825 |
| GO:0061312 | BMP signaling pathway involved in heart development | 2 | 0.001156046 | 0.007861825 |
| GO:0097527 | necroptotic signaling pathway | 2 | 0.001156046 | 0.007861825 |
| GO:2001054 | negative regulation of mesenchymal cell apoptotic process | 2 | 0.001156046 | 0.007861825 |
| GO:2001141 | regulation of RNA biosynthetic process | 2 | 0.001156046 | 0.007861825 |
| GO:0001756 | somitogenesis | 4 | 0.001178285 | 0.007988554 |
| GO:0010881 | regulation of cardiac muscle contraction by regulation of the release of sequestered calcium ion | 3 | 0.001224602 | 0.00817754 |
| GO:0035567 | non-canonical Wnt signaling pathway | 3 | 0.001224602 | 0.00817754 |
| GO:0048260 | positive regulation of receptor-mediated endocytosis | 3 | 0.001224602 | 0.00817754 |
| GO:0048844 | artery morphogenesis | 3 | 0.001224602 | 0.00817754 |
| GO:0050870 | positive regulation of T cell activation | 3 | 0.001224602 | 0.00817754 |
| GO:0018108 | peptidyl-tyrosine phosphorylation | 6 | 0.001329762 | 0.008853098 |
| GO:0002053 | positive regulation of mesenchymal cell proliferation | 3 | 0.001382545 | 0.009095257 |
| GO:0010613 | positive regulation of cardiac muscle hypertrophy | 3 | 0.001382545 | 0.009095257 |
| GO:0035307 | positive regulation of protein dephosphorylation | 3 | 0.001382545 | 0.009095257 |
| GO:0051894 | positive regulation of focal adhesion assembly | 3 | 0.001382545 | 0.009095257 |
| GO:0048468 | cell development | 4 | 0.001454031 | 0.009509107 |
| GO:0048839 | inner ear development | 4 | 0.001454031 | 0.009509107 |
| GO:0007565 | female pregnancy | 5 | 0.001530078 | 0.009956627 |
| GO:0007507 | heart development | 8 | 0.001531443 | 0.009956627 |
| GO:0032728 | positive regulation of interferon-beta production | 3 | 0.001552718 | 0.009964096 |
| GO:0032967 | positive regulation of collagen biosynthetic process | 3 | 0.001552718 | 0.009964096 |
| GO:0048754 | branching morphogenesis of an epithelial tube | 3 | 0.001552718 | 0.009964096 |
| GO:0019233 | sensory perception of pain | 4 | 0.001555139 | 0.009964096 |
| GO:0030326 | embryonic limb morphogenesis | 4 | 0.001555139 | 0.009964096 |
| GO:0003179 | heart valve morphogenesis | 2 | 0.001608997 | 0.009964096 |
| GO:0003223 | ventricular compact myocardium morphogenesis | 2 | 0.001608997 | 0.009964096 |
| GO:0021978 | telencephalon regionalization | 2 | 0.001608997 | 0.009964096 |
| GO:0035234 | ectopic germ cell programmed cell death | 2 | 0.001608997 | 0.009964096 |
| GO:0043270 | positive regulation of ion transport | 2 | 0.001608997 | 0.009964096 |
| GO:0044691 | tooth eruption | 2 | 0.001608997 | 0.009964096 |
| GO:0045630 | positive regulation of T-helper 2 cell differentiation | 2 | 0.001608997 | 0.009964096 |
| GO:0051101 | regulation of DNA binding | 2 | 0.001608997 | 0.009964096 |
| GO:0071599 | otic vesicle development | 2 | 0.001608997 | 0.009964096 |
| GO:1900122 | positive regulation of receptor binding | 2 | 0.001608997 | 0.009964096 |
| GO:1901841 | regulation of high voltage-gated calcium channel activity | 2 | 0.001608997 | 0.009964096 |
| GO:1905460 | negative regulation of vascular associated smooth muscle cell apoptotic process | 2 | 0.001608997 | 0.009964096 |

Supplementary Table 3: 72 pathways that show significant enrichment for OA.

| Supplementary Table 3 | | | |
| --- | --- | --- | --- |
| Description | pvalue | padjust | Genes.included.in.pathway |
| Cytokine-cytokine receptor interaction | 4.30E-18 | 8.76E-16 | IL6,BMP5,XCL2,TNF,IL1A,IL1B,TNFRSF1B,TGFB1,IL1RN,GDF5,TNFSF11,TNFRSF11B,TNFRSF1A,CD40,CCR2,IL16,IL18,TGFBR1,IL4R,CXCL8,CCL3,LEP,BMP4,IL13,IL4,GHR,CCL8,BMPR1A,GH1,BMP2 |
| AGE-RAGE signaling pathway in diabetic complications | 5.88E-13 | 5.99E-11 | IL6,MMP2,TNF,IL1A,IL1B,TGFB1,SMAD3,NFKB1,AGER,MAPK8,TGFBR1,SERPINE1,CXCL8,VEGFA,COL1A1,CCND1 |
| Chagas disease (American trypanosomiasis) | 1.01E-11 | 6.84E-10 | TLR2,IL6,TNF,ACE,IL1B,TGFB1,TLR9,NFKB1,MAPK8,TNFRSF1A,BDKRB2,TGFBR1,SERPINE1,CXCL8,CCL3 |
| Inflammatory bowel disease (IBD) | 6.48E-11 | 3.31E-09 | TLR2,IL6,TNF,IL1A,IL1B,TGFB1,SMAD3,NFKB1,IL18,IL4R,IL13,IL4 |
| Rheumatoid arthritis | 3.78E-10 | 1.54E-08 | TLR2,IL6,MMP1,TNF,IL1A,IL1B,TGFB1,TNFSF11,MMP3,IL18,CXCL8,CCL3,VEGFA |
| IL-17 signaling pathway | 6.61E-10 | 2.25E-08 | IL6,PTGS2,MMP1,TNF,IL1B,MMP3,MMP9,NFKB1,MAPK8,MMP13,CXCL8,IL13,IL4 |
| Malaria | 1.34E-09 | 3.91E-08 | TLR2,IL6,TNF,IL1B,TGFB1,TLR9,CD40,COMP,IL18,CXCL8 |
| Fluid shear stress and atherosclerosis | 8.88E-09 | 2.26E-07 | MMP2,TNF,IL1A,IL1B,MMP9,NFKB1,MAPK8,TNFRSF1A,CALM1,VEGFA,CALM3,BMP4,CALM2,BMPR1A |
| Tuberculosis | 2.98E-08 | 6.74E-07 | TLR2,IL6,TNF,IL1A,IL1B,TGFB1,TLR9,NFKB1,MAPK8,TNFRSF1A,VDR,IL18,CALM1,CALM3,CALM2 |
| TGF-beta signaling pathway | 7.80E-08 | 1.59E-06 | BMP5,TNF,TGFB1,SMAD3,GDF5,TGFBR1,SP1,BMP4,SMAD1,BMPR1A,BMP2 |
| Pertussis | 1.12E-07 | 2.02E-06 | IL6,TNF,IL1A,IL1B,NFKB1,MAPK8,CALM1,CXCL8,CALM3,CALM2 |
| PI3K-Akt signaling pathway | 1.19E-07 | 2.02E-06 | TGFA,TLR2,IL6,NFKB1,LPAR1,COL2A1,MAGI1,COMP,COL9A2,IL4R,VEGFA,COL1A1,COL9A1,PDGFRB,CCND1,IL4,FGFR4,GHR,IGF1,GH1 |
| Toll-like receptor signaling pathway | 2.05E-07 | 3.21E-06 | TLR2,IL6,TNF,IL1B,TLR9,NFKB1,MAPK8,TLR3,CD40,CXCL8,CCL3 |
| Cellular senescence | 3.76E-07 | 5.48E-06 | IL6,IL1A,TGFB1,SMAD3,NFKB1,TGFBR1,SERPINE1,IGFBP3,CALM1,CXCL8,CALM3,CALM2,CCND1 |
| TNF signaling pathway | 5.34E-07 | 7.27E-06 | IL6,PTGS2,TNF,IL1B,TNFRSF1B,SOCS3,MMP3,MMP9,NFKB1,MAPK8,TNFRSF1A |
| Human cytomegalovirus infection | 6.24E-07 | 7.96E-06 | IL6,PTGS2,TNF,IL1B,NFKB1,TNFRSF1A,CALM1,SP1,CXCL8,CCL3,VEGFA,CALM3,CALM2,CCND1,PTK2B |
| Viral protein interaction with cytokine and cytokine receptor | 1.27E-06 | 1.52E-05 | IL6,XCL2,TNF,TNFRSF1B,TNFRSF1A,CCR2,IL18,CXCL8,CCL3,CCL8 |
| Non-alcoholic fatty liver disease (NAFLD) | 1.37E-06 | 1.55E-05 | PPARA,IL6,TNF,IL1A,IL1B,TGFB1,SOCS3,NFKB1,MAPK8,TNFRSF1A,CXCL8,LEP |
| Osteoclast differentiation | 1.61E-06 | 1.73E-05 | TNF,IL1A,IL1B,TGFB1,SOCS3,TNFSF11,NFKB1,TNFRSF11B,MAPK8,TNFRSF1A,TGFBR1 |
| Hippo signaling pathway | 1.94E-06 | 1.98E-05 | BMP5,TGFB1,SMAD3,GDF5,TGFBR1,SERPINE1,WNT5B,BMP4,SMAD1,CCND1,BMPR1A,BMP2 |
| Kaposi sarcoma-associated herpesvirus infection | 2.42E-06 | 2.35E-05 | IL6,PTGS2,NFKB1,MAPK8,TNFRSF1A,TLR3,CALM1,CXCL8,VEGFA,CALM3,CALM2,CCND1,HCK |
| Hepatitis B | 3.31E-06 | 3.07E-05 | TLR2,IL6,TNF,TGFB1,SMAD3,MMP9,NFKB1,MAPK8,TLR3,TGFBR1,CXCL8,PTK2B |
| Proteoglycans in cancer | 6.38E-06 | 5.58E-05 | TLR2,MMP2,TNF,TGFB1,PLAU,MMP9,ESR1,WNT5B,VEGFA,COL1A1,TWIST1,CCND1,IGF1 |
| Adipocytokine signaling pathway | 6.57E-06 | 5.58E-05 | PPARA,TNF,TNFRSF1B,SOCS3,NFKB1,MAPK8,TNFRSF1A,LEP |
| Endocrine resistance | 8.94E-06 | 7.29E-05 | MMP2,MMP9,MAPK8,ESR1,SP1,NCOA3,ESR2,CCND1,IGF1 |
| Prostate cancer | 9.73E-06 | 7.55E-05 | TGFA,PLAU,MMP3,MMP9,NFKB1,AR,PDGFRB,CCND1,IGF1 |
| Leishmaniasis | 1.00E-05 | 7.55E-05 | TLR2,PTGS2,TNF,IL1A,IL1B,TGFB1,NFKB1,IL4 |
| Pancreatic cancer | 1.22E-05 | 8.90E-05 | TGFA,TGFB1,SMAD3,NFKB1,MAPK8,TGFBR1,VEGFA,CCND1 |
| NF-kappa B signaling pathway | 1.36E-05 | 9.35E-05 | PTGS2,TNF,IL1B,PLAU,TNFSF11,NFKB1,TNFRSF1A,CD40,CXCL8 |
| Transcriptional misregulation in cancer | 1.38E-05 | 9.35E-05 | IL6,PLAU,MMP3,MMP9,NFKB1,CD40,IGFBP3,SP1,CXCL8,DOT1L,SMAD1,IGF1 |
| Salmonella infection | 1.48E-05 | 9.73E-05 | IL6,IL1A,IL1B,NFKB1,MAPK8,IL18,CXCL8,CCL3 |
| Relaxin signaling pathway | 1.53E-05 | 9.73E-05 | MMP2,MMP1,TGFB1,MMP9,NFKB1,MAPK8,TGFBR1,MMP13,VEGFA,COL1A1 |
| Legionellosis | 1.57E-05 | 9.73E-05 | TLR2,IL6,TNF,IL1B,NFKB1,IL18,CXCL8 |
| C-type lectin receptor signaling pathway | 1.72E-05 | 0.000103207 | IL6,PTGS2,TNF,IL1B,NFKB1,MAPK8,CALM1,CALM3,CALM2 |
| Th17 cell differentiation | 1.86E-05 | 0.000108348 | IL6,IL1B,TGFB1,SMAD3,NFKB1,MAPK8,TGFBR1,IL4R,IL4 |
| Parathyroid hormone synthesis, secretion and action | 2.01E-05 | 0.000113737 | KL,TNFSF11,VDR,SOST,SP1,MMP13,PTHLH,BGLAP,CASR |
| Bladder cancer | 2.35E-05 | 0.000129718 | MMP2,MMP1,MMP9,CXCL8,VEGFA,CCND1 |
| Estrogen signaling pathway | 2.59E-05 | 0.000139073 | TGFA,MMP2,MMP9,ESR1,CALM1,SP1,CALM3,NCOA3,CALM2,ESR2 |
| Prolactin signaling pathway | 6.12E-05 | 0.000320073 | SOCS3,TNFSF11,NFKB1,MAPK8,ESR1,ESR2,CCND1 |
| Human papillomavirus infection | 7.22E-05 | 0.000368349 | PTGS2,TNF,NFKB1,TNFRSF1A,TLR3,COL2A1,MAGI1,COMP,COL9A2,WNT5B,VEGFA,COL1A1,COL9A1,PDGFRB,CCND1 |
| Inflammatory mediator regulation of TRP channels | 9.04E-05 | 0.000450024 | TRPV1,IL1B,MAPK8,BDKRB2,CALM1,CALM3,CALM2,IGF1 |
| Glioma | 9.55E-05 | 0.000463785 | TGFA,CALM1,CALM3,CALM2,PDGFRB,CCND1,IGF1 |
| Amoebiasis | 0.000104071 | 0.000493731 | TLR2,IL6,TNF,IL1B,TGFB1,NFKB1,CXCL8,COL1A1 |
| Jak-STAT signaling pathway | 0.000108041 | 0.000500918 | IL6,SOCS3,IL4R,LEP,PDGFRB,IL13,CCND1,IL4,GHR,GH1 |
| Influenza A | 0.000146098 | 0.000662309 | IL6,TNF,IL1A,IL1B,SOCS3,NFKB1,TNFRSF1A,TLR3,IL18,CXCL8 |
| African trypanosomiasis | 0.000172532 | 0.000765141 | IL6,TNF,IL1B,TLR9,IL18 |
| MAPK signaling pathway | 0.000306688 | 0.001331158 | TGFA,TNF,IL1A,IL1B,TGFB1,NFKB1,MAPK8,TNFRSF1A,TGFBR1,VEGFA,PDGFRB,FGFR4,IGF1 |
| Yersinia infection | 0.000321694 | 0.001367201 | IL6,TNF,IL1B,NFKB1,MAPK8,IL18,CXCL8,PTK2B |
| Protein digestion and absorption | 0.000419557 | 0.001746728 | COL2A1,COL11A1,COL9A2,COL11A2,COL1A1,COL9A1,COL10A1 |
| Focal adhesion | 0.000549153 | 0.002240544 | MAPK8,COL2A1,COMP,COL9A2,VEGFA,COL1A1,COL9A1,PDGFRB,CCND1,IGF1 |
| Pathogenic Escherichia coli infection | 0.000642217 | 0.002568869 | IL6,TNF,IL1B,NFKB1,MAPK8,TNFRSF1A,LPAR1,IL18,CXCL8,HCK |
| Phototransduction | 0.000738687 | 0.002812944 | CALM1,CALM3,CALM2,CNGB1 |
| Asthma | 0.000738687 | 0.002812944 | TNF,CD40,IL13,IL4 |
| Apelin signaling pathway | 0.000744603 | 0.002812944 | SMAD3,PDE3B,TGFBR1,SERPINE1,CALM1,CALM3,CALM2,CCND1 |
| Measles | 0.000819692 | 0.003040313 | TLR2,IL6,IL1A,IL1B,TLR9,NFKB1,MAPK8,CCND1 |
| Human immunodeficiency virus 1 infection | 0.00086774 | 0.003161054 | TLR2,TNF,TNFRSF1B,NFKB1,MAPK8,TNFRSF1A,CALM1,CALM3,CALM2,PTK2B |
| Signaling pathways regulating pluripotency of stem cells | 0.000900761 | 0.003193719 | SMAD3,POU5F1,WNT5B,BMP4,SMAD1,FGFR4,IGF1,BMPR1A |
| Insulin resistance | 0.000908018 | 0.003193719 | PPARA,IL6,TNF,SOCS3,NFKB1,MAPK8,TNFRSF1A |
| Antifolate resistance | 0.00095713 | 0.0033094 | IL6,TNF,IL1B,NFKB1 |
| Toxoplasmosis | 0.001012113 | 0.003441183 | TLR2,TNF,TGFB1,NFKB1,MAPK8,TNFRSF1A,CD40 |
| Human T-cell leukemia virus 1 infection | 0.001115183 | 0.003693475 | IL6,TNF,TGFB1,SMAD3,NFKB1,MAPK8,TNFRSF1A,CD40,TGFBR1,CCND1 |
| NOD-like receptor signaling pathway | 0.001122527 | 0.003693475 | IL6,TNF,IL1B,NFKB1,MAPK8,IL18,CXCL8,NAMPT,CASR |
| Breast cancer | 0.001236632 | 0.004004333 | TNFSF11,ESR1,WNT5B,SP1,NCOA3,ESR2,CCND1,IGF1 |
| Colorectal cancer | 0.001454216 | 0.004635314 | TGFA,TGFB1,SMAD3,MAPK8,TGFBR1,CCND1 |
| Ras signaling pathway | 0.001784165 | 0.005599532 | TGFA,NFKB1,MAPK8,CALM1,VEGFA,CALM3,CALM2,PDGFRB,FGFR4,IGF1 |
| Graft-versus-host disease | 0.001879859 | 0.005810472 | IL6,TNF,IL1A,IL1B |
| Wnt signaling pathway | 0.002120822 | 0.006457429 | SMAD3,MAPK8,SFRP1,SOST,WNT5B,ROR2,CCND1,SFRP4 |
| GnRH signaling pathway | 0.002173393 | 0.006520178 | MMP2,MAPK8,CALM1,CALM3,CALM2,PTK2B |
| Hematopoietic cell lineage | 0.002689687 | 0.007952117 | IL6,TNF,IL1A,IL1B,IL4R,IL4 |
| FoxO signaling pathway | 0.00277171 | 0.008077556 | IL6,TGFB1,SMAD3,MAPK8,TGFBR1,CCND1,IGF1 |
| Renin secretion | 0.003085749 | 0.008866097 | ACE,PDE3B,CALM1,CALM3,CALM2 |
| Rap1 signaling pathway | 0.003233938 | 0.009162824 | LPAR1,MAGI1,CALM1,VEGFA,CALM3,CALM2,PDGFRB,FGFR4,IGF1 |

Supplementary Table 4: Gene sets include the osteoporosis list and the cancer genes.

| Supplementary Table 4 | | | | | | |
| --- | --- | --- | --- | --- | --- | --- |
| Gene.set | Num.mapped | Mean.degree | Num.mapped.in.specific.degree.region | Gene.ratio | degree.lower | degree.higher |
| Osteoarthritis | 151 | 52.51655629 | 80 | 52.98 | 1 | 20 |
| Osteoporosis | 300 | 54.05 | 153 | 51 | 1 | 20 |
| CAgenes | 485 | 74.97113402 | 147 | 30.31 | 1 | 20 |
